# Supplementary material
Source: HighWire-hosted journal article supplement (https://jnis.bmj.com/highwire/filestream/169713/field_highwire_adjunct_files/0/neurintsurg-2021-018078supp001_data_supplement.pdf)
Supplement: neurintsurg-2021-018078supp001_data_supplement.pdf [file neurintsurg-2021-018078supp001_data_supplement.pdf]

Supplemental Material

Supplemental Figure 1: Flow Chart

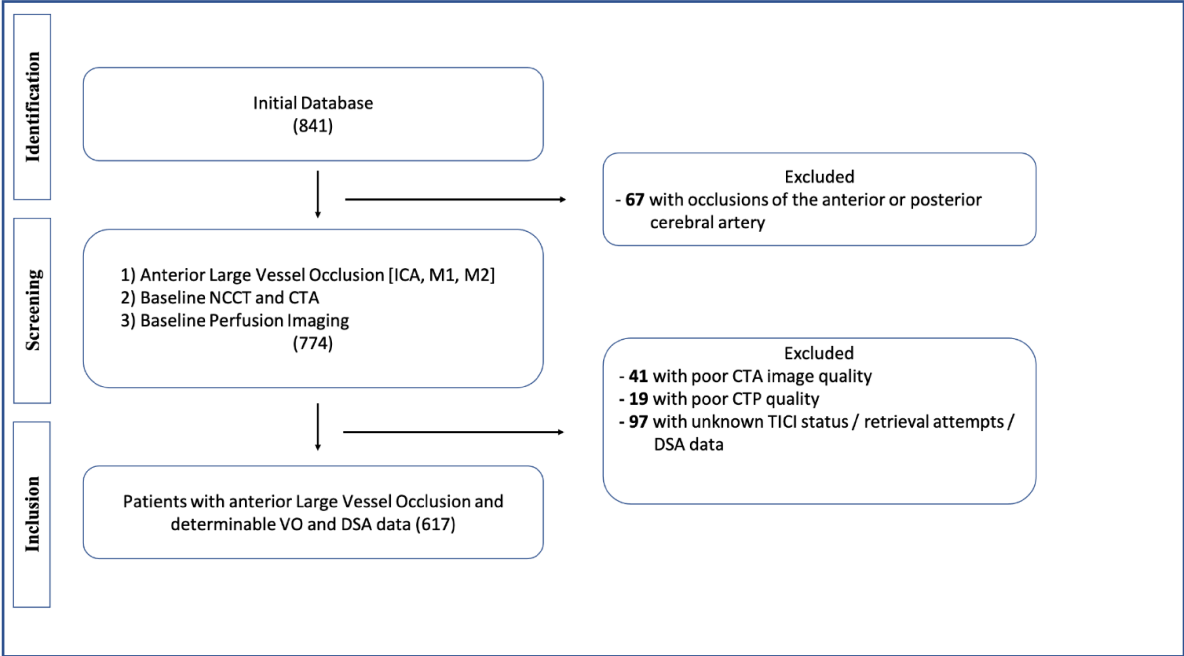

Supplemental Table 1: First-Pass Reperfusers grouped by time-periods (in years)

| Group and timeperiod           |   | First-Pass Reperfusion | Total MT |
|--------------------------------|---|------------------------|----------|
| G1<br>(01.01.2010–31.12.2012)  | N | 4                      | 20       |
|                                | % | 2.00%                  | 3.30%    |
| G2<br>01.01.2013 – 31.12.2016) | N | 60                     | 144      |
|                                | % | 29.30%                 | 23.50%   |
| G3<br>01.01.2014 – 31.12.2020) | N | 141                    | 448      |
|                                | % | 68.80%                 | 73.20%   |
| Total                          | N | 205                    | 612      |
|                                | % | 100.00%                | 100.00%  |

Legend: Subgroup analysis of all included patients undergoing endovascular thrombectomy. Certain time-periods were defined as follows: G1 (01.01.2010 – 31.12.2012), G2 (01.01.2013 – 31.12.2016) and G3 (01.01.2014 – 31.12.2020) and the number of successful first-pass reperfusers are noted in the second and third column with respect to all patients who received mechanical thrombectomy treatment during the timecourse.
